# Supplementary material for: Kinetics of cisplatin binding to short r(GG) containing miRNA mimics – influence of Na+versus K+, temperature and hydrophobicity on reactivity
Source: Royal Society of Chemistry journal article supplement (doi:10.1039/c5dt00663e), 2015-01-01
Supplement: c5dt00663e1.pdf [file c5dt00663e1.pdf]

Electronic Supplementary Information to:

## Kinetics of cisplatin binding to short r(GG) containing miRNA mimics – influence of Na<sup>+</sup> versus K<sup>+</sup>, temperature and hydrophobicity on reactivity

Alak Alshiekh,<sup>a</sup> Maria Clausén<sup>a</sup> and Sofi K.C. Elmroth<sup>a\*</sup>

<sup>a</sup> Biochemistry and Structural Biology, KILU, Lund University, POBox 124, SE-221 00 Lund, Sweden.

\*Corresponding author; E-mail: [sofi.elmroth@biochemistry.lu.se](mailto:sofi.elmroth@biochemistry.lu.se)

### Content

- Table S1: Melting temperatures together with observed rate constants at  $C_{\text{Na}^+} = C_{\text{K}^+} = 122 \text{ mM}$   
Table S2: Observed pseudo-first-order rate constants at  $C_{\text{Na}^+} = 50 \text{ mM}$  with and without 10% EtOH  
Table S3: Second-order rate constants as a function of temperature  
Table S4: List of obtained products  $k_{2,\text{app}}C_{\text{Na}^+}$   
Figure S1: Rosetta all-atom score vs rmsd  
Figure S2: Spectra and melting curves  
Figure S3: Primary kinetic data collected in Buffers B, C, and D together with concentration dependence in Buffer B  
Figure S4: Temperature dependence and Eyring plots

**Table S1.** Summary of melting temperatures ( $T_m$ ) and reaction rate constants ( $k_{obs}$  and  $k_{2,app}$ ) for RNA-1-1, RNA-1-1-S, RNA-1-3, RNA-1-3-X.<sup>a</sup>

| Duplex                 | $T_m^b$ (°C) | $10^4 \times k_{obs}^c$ (s <sup>-1</sup> ) |                       |                       |                       |                       | $k_{2,app}^d$ (M <sup>-1</sup> s <sup>-1</sup> ) | Reference                |
|------------------------|--------------|--------------------------------------------|-----------------------|-----------------------|-----------------------|-----------------------|--------------------------------------------------|--------------------------|
|                        |              | $C_{Pt}$ (μM)<br>7.5                       | $C_{Pt}$ (μM)<br>15.0 | $C_{Pt}$ (μM)<br>22.5 | $C_{Pt}$ (μM)<br>30.0 | $C_{Pt}$ (μM)<br>45.0 |                                                  |                          |
| $C_{Na^+} = 122$ mM    |              |                                            |                       |                       |                       |                       |                                                  |                          |
| RNA-1-1                | 61.6 ± 0.2   | 0.54                                       | 1.6                   | 2.2                   | 2.7                   | 3.5                   | 7.7 ± 0.5                                        | 2l                       |
| RNA-1-1-S              | 56.7 ± 0.1   | 1.6 ± 0.3                                  | 2.7 ± 0.2             | 3.3 ± 0.3             | 4.1 ± 0.2             | 5.6 ± 0.5             | 10.5 ± 0.6                                       | 2n                       |
| RNA-1-3                | 39.2 ± 0.1   | 2.5                                        | 5.4                   | 7.5                   | 9.4                   | 14                    | 29.7 ± 1.1                                       | 2n                       |
| RNA-1-3 ( $T = 28$ °C) |              | 0.44 ± 0.01                                | 0.9 ± 0.2             | 1.5 ± 0.4             | 2.0 ± 0.4             | 2.7 ± 0.1             | 6.0 ± 0.5                                        | <i>This work</i>         |
| RNA-1-3-X              | 53.1 ± 0.2   | 1.1 ± 0.3                                  | 2.3 ± 0.1             | 3.5 <sup>f</sup>      | 4.7 ± 0.2             | 7.0 ± 0.2             | 15.8 ± 0.3                                       | <i>This work</i>         |
| $C_{K^+} = 122$ mM     |              |                                            |                       |                       |                       |                       |                                                  |                          |
| RNA-1-1                | 59.5 ± 0.3   | 1.3 ± 0.3                                  | 2.2 ± 0.3             | 3.0 ± 0.1             | 3.8 ± 0.3             | 4.7 ± 0.2             | 9.2 ± 0.6                                        | <i>This work</i>         |
| RNA-1-1-S              | 55.0 ± 0.2   | 1.8 ± 0.4                                  | 2.7 ± 0.3             | 4.0 ± 0.5             | 4.7 ± 0.7             | 6.5 ± 1               | 12.6 ± 1.1                                       | <i>This work</i>         |
| RNA-1-3                | 36.5 ± 0.3   | <i>n.d.</i>                                | <i>n.d.</i>           | <i>n.d.</i>           | <i>n.d.</i>           | <i>n.d.</i>           | <i>n.d.</i>                                      | <i>n.d.</i> <sup>e</sup> |
| RNA-1-3 ( $T = 28$ °C) |              | 0.7 ± 0.4                                  | 1.2 ± 0.2             | 1.9 ± 0.4             | 2.6 ± 0.3             | 3.7 ± 0.5             | 8.0 ± 0.6                                        | <i>This work</i>         |
| RNA-1-3-X              | 50.9 ± 0.1   | 1.9 ± 0.9                                  | 3.3 ± 0.7             | 4.9 ± 0.6             | 6.1 ± 0.5             | 9.2 ± 0.7             | 19.4 ± 1.2                                       | <i>This work</i>         |

<sup>a</sup> $C_T = 3.0$  μM and  $T = 38$  °C if nothing else stated. <sup>b</sup> Measurements performed in triplicates. Indicated errors correspond to the standard deviation. <sup>c</sup> Indicated errors for  $k_{obs}$  correspond to the standard deviation. <sup>d</sup> Indicated errors for  $k_{2,app}$  correspond to the standard error of the linear curve fit based on data points from five separate measurements;  $7.5$  μM <  $C_{Pt}$  <  $45$  μM. <sup>e</sup> Reaction over within mixing time. <sup>f</sup> Only measured once.

**Table S2.** Summary of reaction rate constants ( $k_{\text{obs}}$  and  $k_{2,\text{app}}$ ) in buffer with  $C_{\text{Na}^+} = 50 \text{ mM}$ , with and without 10% EtOH for RNA-1-1, RNA-1-3-X and RNA-1-3.<sup>a</sup>

| Duplex                                                                                | $T_m$ ( $^{\circ}\text{C}$ ) | $10^4 \times k_{\text{obs}}^b$ ( $\text{s}^{-1}$ ) |      | $k_{2,\text{app}}^c$ ( $\text{M}^{-1}\text{s}^{-1}$ ) |
|---------------------------------------------------------------------------------------|------------------------------|----------------------------------------------------|------|-------------------------------------------------------|
|                                                                                       |                              | $C_{1a}$ ( $\mu\text{M}$ )                         | 15.0 |                                                       |
| $C_{\text{Na}^+} = 50 \text{ mM at } 38 \text{ }^{\circ}\text{C}$                     |                              |                                                    |      |                                                       |
| RNA-1-1                                                                               | $54.9 \pm 0.1$               | $3.1 \pm 0.7$                                      |      | $20.9 \pm 5$                                          |
| RNA-1-1-S                                                                             | $49.8 \pm 0.1$               | $3.9 \pm 0.1$                                      |      | $26.1 \pm 0.2$                                        |
| RNA-1-3-X                                                                             | $47.3 \pm 0.3$               | $5.9 \pm 0.7$                                      |      | $39.3 \pm 4.7$                                        |
| $C_{\text{Na}^+} = 50 \text{ mM} + 10\% \text{ EtOH at } 38 \text{ }^{\circ}\text{C}$ |                              |                                                    |      |                                                       |
| RNA-1                                                                                 | $53.7 \pm 0.5$               | $1.9 \pm 0.2$                                      |      | $12.9 \pm 1.4$                                        |
| RNA-1-1-S                                                                             | $46.7 \pm 0.8$               | $2.4 \pm 0.4$                                      |      | $16 \pm 2.5$                                          |
| RNA-1-3-X                                                                             | $46.3 \pm 0.1$               | $3.6 \pm 0.2$                                      |      | $24.3 \pm 1.4$                                        |
| $C_{\text{Na}^+} = 50 \text{ mM at } 28 \text{ }^{\circ}\text{C}$                     |                              |                                                    |      |                                                       |
| RNA-1-3                                                                               | $32.5 \pm 0.2$               | $2.4 \pm 0.3$                                      |      | $15.7 \pm 1.8$                                        |
| $C_{\text{Na}^+} = 50 \text{ mM} + 10\% \text{ EtOH at } 28 \text{ }^{\circ}\text{C}$ |                              |                                                    |      |                                                       |
| RNA-1-3                                                                               | $33.0 \pm 0.2$               | $1.6 \pm 0.1$                                      |      | $10.7 \pm 0.5$                                        |

<sup>a</sup>  $C_T = 3.0 \mu\text{M}$ . <sup>b</sup> Measurements performed in triplicates. Indicated errors correspond to the standard deviation. <sup>c</sup> Indicated errors for the  $k_{2,\text{app}}$  correspond to the standard deviation of triplicate data points.

**Table S3.** Summary of second-order rate constants as a function of temperature and activation parameters for the reaction of **1a** with RNA-1-1, RNA-1-1-S, RNA-1-3 and RNA-1-3-X.

| Duplex    | $T_m^b$<br>(°C) | $T$<br>(°C) | $k_{2,app}^c$<br>(M <sup>-1</sup> s <sup>-1</sup> ) | $\Delta H^\ddagger$<br>(kcal mol <sup>-1</sup> ) | $\Delta S^\ddagger$<br>(cal K <sup>-1</sup> mol <sup>-1</sup> ) |
|-----------|-----------------|-------------|-----------------------------------------------------|--------------------------------------------------|-----------------------------------------------------------------|
| RNA-1-3   | 39.2 ± 0.1      | 23          | 2.8 ± 0.2                                           | 31 ± 3                                           | 49 ± 5                                                          |
|           |                 | 28          | 7.9 ± 0.7                                           |                                                  |                                                                 |
|           |                 | 33          | 21.6 ± 0.5                                          |                                                  |                                                                 |
|           |                 | 38          | 36 <sup>f</sup>                                     |                                                  |                                                                 |
| RNA-1-3-X | 53.1 ± 0.2      | 33          | 7.6 ± 0.3                                           | 34 ± 3                                           | 57 ± 5                                                          |
|           |                 | 38          | 15.4 ± 0.3                                          |                                                  |                                                                 |
|           |                 | 43          | 37.0 ± 0.3                                          |                                                  |                                                                 |
|           |                 | 48          | 111 ± 3                                             |                                                  |                                                                 |
| RNA-1-1-S | 56.7 ± 0.1      | 33          | 10.3 ± 0.5                                          | 23 ± 1                                           | 22 ± 1                                                          |
|           |                 | 38          | 18 ± 1.3 <sup>f</sup>                               |                                                  |                                                                 |
|           |                 | 43          | 35 ± 1.0                                            |                                                  |                                                                 |
|           |                 | 48          | 63.3 ± 0.6                                          |                                                  |                                                                 |
| RNA-1-1   | 61.6 ± 0.2      | 33          | 6.9 ± 0.2                                           | 28 ± 2                                           | 36 ± 3                                                          |
|           |                 | 38          | 10.7 ± 0.3 <sup>f</sup>                             |                                                  |                                                                 |
|           |                 | 48          | 50 ± 15                                             |                                                  |                                                                 |
|           |                 | 58          | 222 ± 35                                            |                                                  |                                                                 |

<sup>a</sup> $C_T = 3.0 \mu\text{M}$ ,  $C_{\text{Na}^+} = 122 \text{ mM}$ . <sup>b</sup> Measurements performed in triplicates. <sup>c</sup> $k_{2,app}$  was calculated as  $k_{\text{obs}}/C_{\text{Pt}}$  (15  $\mu\text{M}$ ). Indicated error for  $k_{2,app}$  correspond to the standard deviation of triplicate data points with  $C_{\text{Pt}} = 15 \mu\text{M}$ . <sup>f</sup>Data from Ref# 3n.

**Table S4.** Comparison of the products  $kK_{\text{ass}}$  for the reactions of **1a** with RNA-1-1, RNA-1-1-S, RNA-1-3-X, and RNA-1-3 after adjustment with respect to salt concentration in agreement with mechanism outlined in Eqns (2) – (5).

| Duplex    | $C_{\text{Na}^+}$ (mM) | $k_{2,\text{app}}$ ( $\text{M}^{-1}\text{s}^{-1}$ ) <sup>a</sup> | $k K_{\text{ass}}$<br>( $= k_{2,\text{app}} \cdot C_{\text{Na}^+}$ ( $\text{s}^{-1}$ )) <sup>a</sup> |
|-----------|------------------------|------------------------------------------------------------------|------------------------------------------------------------------------------------------------------|
| RNA-1-1   | 50                     | 21                                                               | 1.05                                                                                                 |
|           | 122                    | 7.7                                                              | 0.939                                                                                                |
| RNA-1-1-S | 50                     | 26.1                                                             | 1.30                                                                                                 |
|           | 122                    | 10.5                                                             | 1.28                                                                                                 |
| RNA-1-3-X | 50                     | 39                                                               | 1.95                                                                                                 |
|           | 122                    | 15.8                                                             | 1.93                                                                                                 |
| RNA-1-3   | 50                     | 15.7 <sup>b</sup>                                                | 0.78 <sup>b</sup>                                                                                    |
|           | 122                    | 6.0 <sup>b</sup>                                                 | 0.73 <sup>b</sup>                                                                                    |
|           | 122                    | 29.7                                                             | 3.62                                                                                                 |

<sup>a</sup>  $k_{2,\text{app}}$  determined at 38 °C if nothing else stated, <sup>b</sup>  $k_{2,\text{app}}$  determined at 28 °C.

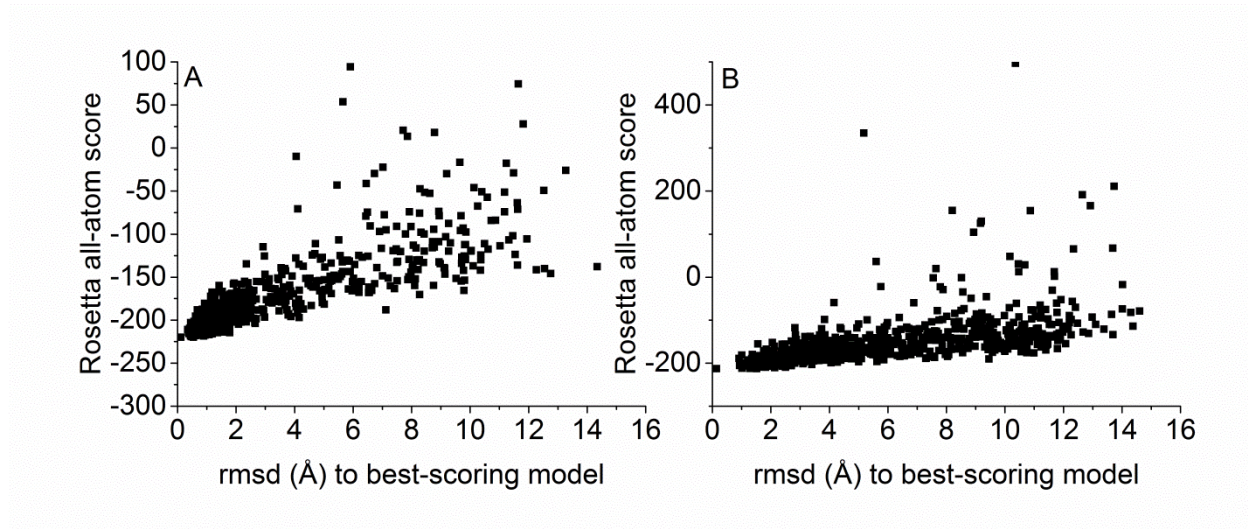

**Figure S1.** Rosetta all-atom score vs rmsd for (A) RNA-1-1 and (B) RNA-1-3, showing convergence of the structure simulations.

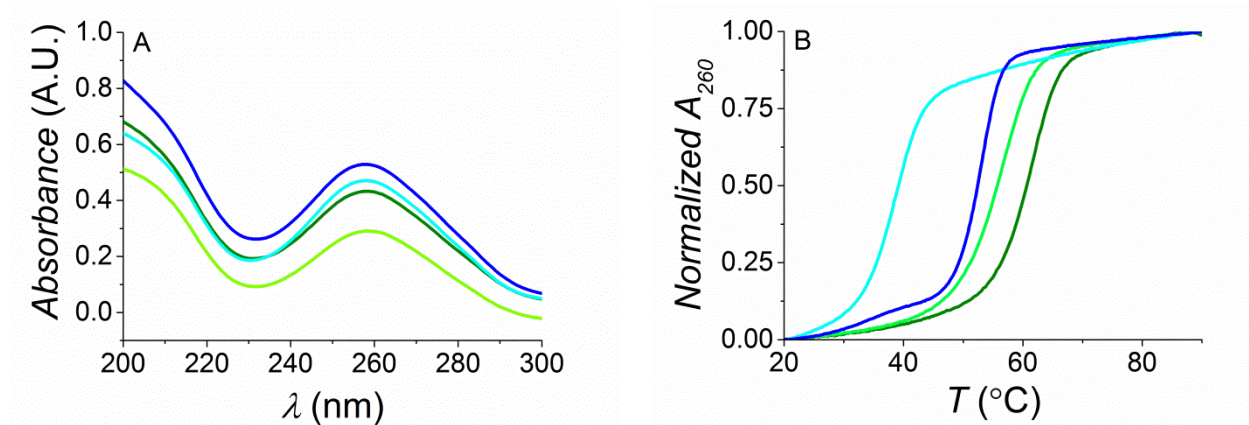

**Figure S2.** (A) Spectra and (B) melting curves for RNA-1-3-X (dark blue), RNA-1-3 (light blue), RNA-1-1 (dark green), and RNA-1-1-S (light green). The spectra were recorded in Buffer A with  $C_{\text{Na}^+} = 122$  mM and  $C_{\text{T}} = 3.0$   $\mu\text{M}$ .

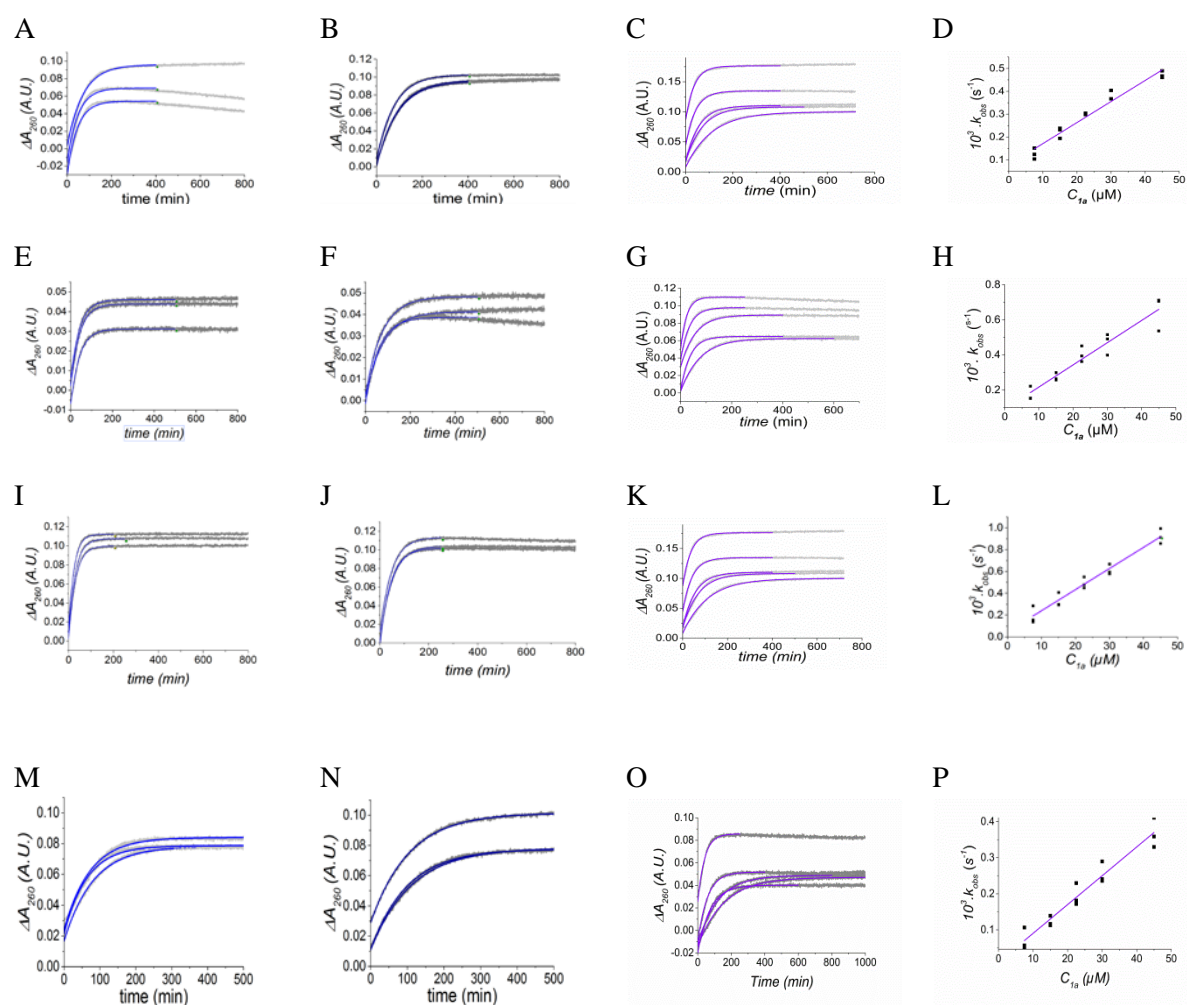

**Figure S3.** Absorbance change as a function of time (gray), together with fits of a single-exponential function to experimental data (solid lines, blue or purple), in buffered solution;  $C_{Na^+} = 50$  mM (Buffer C) after addition of **1a** to (A) RNA-1-1, (E) RNA-1-1-S, (I) RNA-1-3-X and (M) RNA-1-3. All measurements were conducted with  $C_{1a} = 15.0$   $\mu M$ ,  $C_T = 3.0$   $\mu M$ . Absorbance change as a function of time, together with fits of a single-exponential function to experimental data (blue lines), in buffered solution;  $C_{Na^+} = 50$  mM (Buffer D) after addition of **1a** to (B) RNA-1-1, (F) RNA-1-1-S, (J) RNA-1-3-X and (N) RNA-1-3. All measurements were conducted with  $C_{1a} = 15.0$   $\mu M$ ,  $C_T = 3.0$   $\mu M$ . Absorbance change as a function of time, together with fits of a single-exponential function to experimental data (purple lines) in buffered solution;  $C_{K^+} = 122$  mM (Buffer B) after addition of **1a** to (C) RNA-1-1, (G) RNA-1-1-S, (K) RNA-1-3-X and (O) RNA-1-3. All measurements were conducted with  $C_{1a} = 7.5$ – $45.0$   $\mu M$ ,  $C_T = 3.0$   $\mu M$ . Observed pseudo-first-order rate constants ( $k_{obs}$ ) plotted as a function of  $C_{1a}$  in the interval  $7.5$ – $45.0$   $\mu M$ , together with linear regression lines allowing for determination of  $k_{2,app}$  from the slope; (D) RNA-1-1, (H) RNA-1-1-S, (L) RNA-1-3-X, and (P) RNA-1-3. All measurements were conducted in triplicates with  $C_T = 3.0$   $\mu M$  and  $C_{K^+} = 122$  mM (Buffer B).



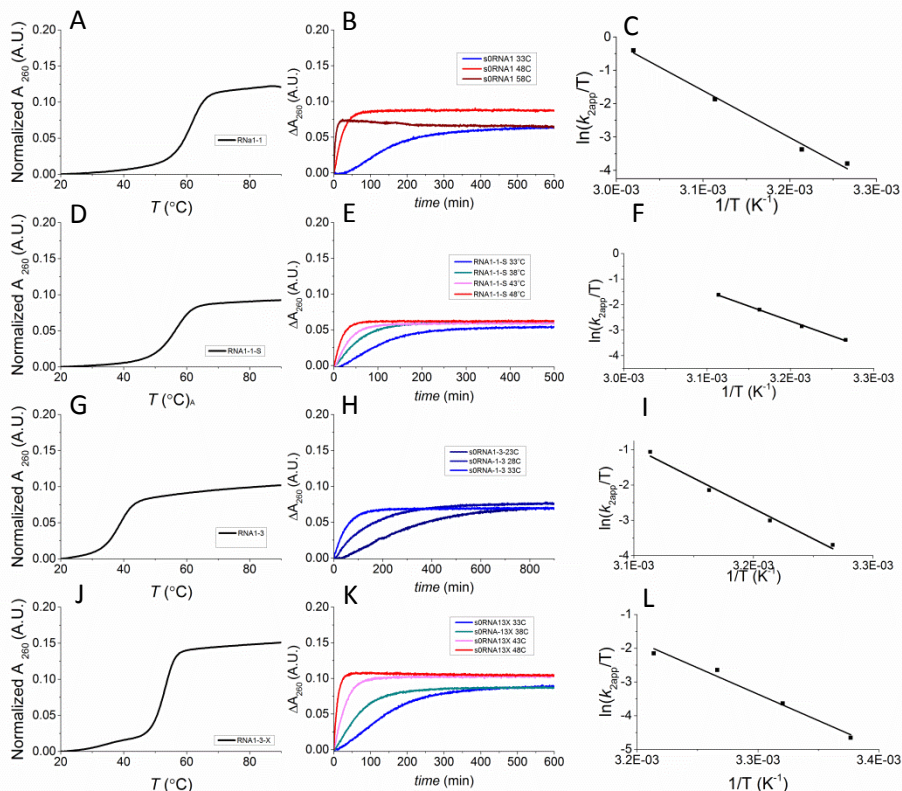

**Figure S4.** Absorbance change as a function of temperature and time. Melting curve of (A) RNA-1-1, (D) RNA-1-1-S, (G) RNA-1-3, and (J) RNA-1-3-X. Absorbance change as a function of time after addition of **1a** to (B) RNA-1-1, (E) RNA-1-1-S, (H) RNA-1-3, and (K) RNA-1-3-X. All reactions were followed at  $\lambda = 260$  nm, and conducted with  $C_{1a} = 15.0$   $\mu$ M,  $C_T = 3.0$   $\mu$ M and  $C_{K^+} = 122$  mM (Buffer B). Eyring plot of  $\ln(k_{2,app}/T)$  as a function of  $1/T$  for the reaction of **1a** with (C) RNA-1-1 (F) RNA-1-1-S, (I) RNA-1-3, and (L) RNA-1-3-X. Figures (C) and (I) contain one datapoint each retrieved from Ref#2n (compare Table S3).
